# Supplementary material for: SARS-CoV-2 pseudovirus dysregulates hematopoiesis and induces inflammaging of hematopoietic stem and progenitor cells
Source: Springer Nature journal article supplement (doi:10.1038/s12276-025-01416-1), 2025-03-03
Supplement: MOESM1 [file 12276_2025_1416_MOESM1_ESM.pdf]

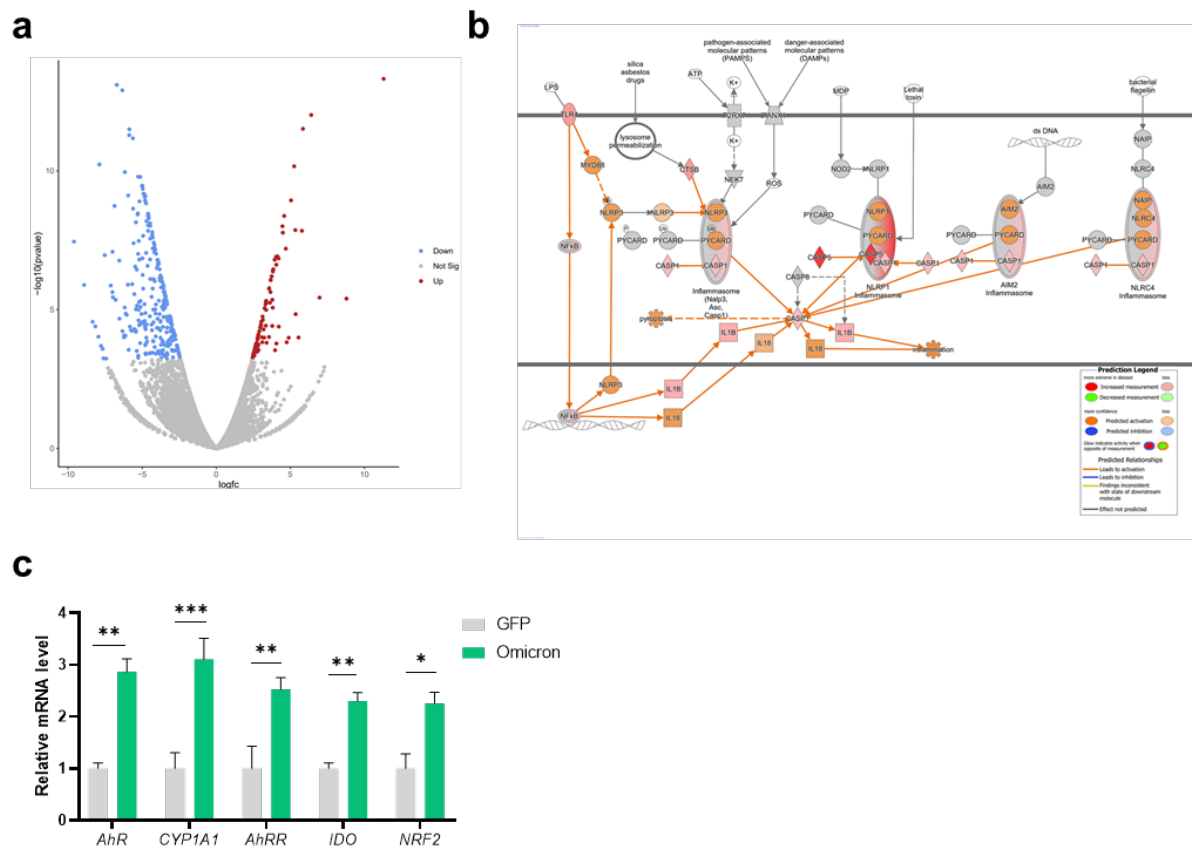

**Supplementary Fig. 1.** (a) A volcano plot highlighting DEGs in Omicron PsV-infected HSPCs compared to GFP-infected HSPCs. (b) IPA of inflammation/NLRP3-related signals in Omicron PsV-infected HSPCs compared to GFP-infected HSPCs is shown. (c) Transcriptional levels of ROS-related factor in Omicron PsV-infected HSPCs were determined by qRT-PCR. mRNA levels were normalized to *GAPDH*. \*,  $p < 0.05$ ; \*\*,  $p < 0.01$ ; \*\*\*,  $p < 0.001$ . Results are represented as the means  $\pm$  SEM.

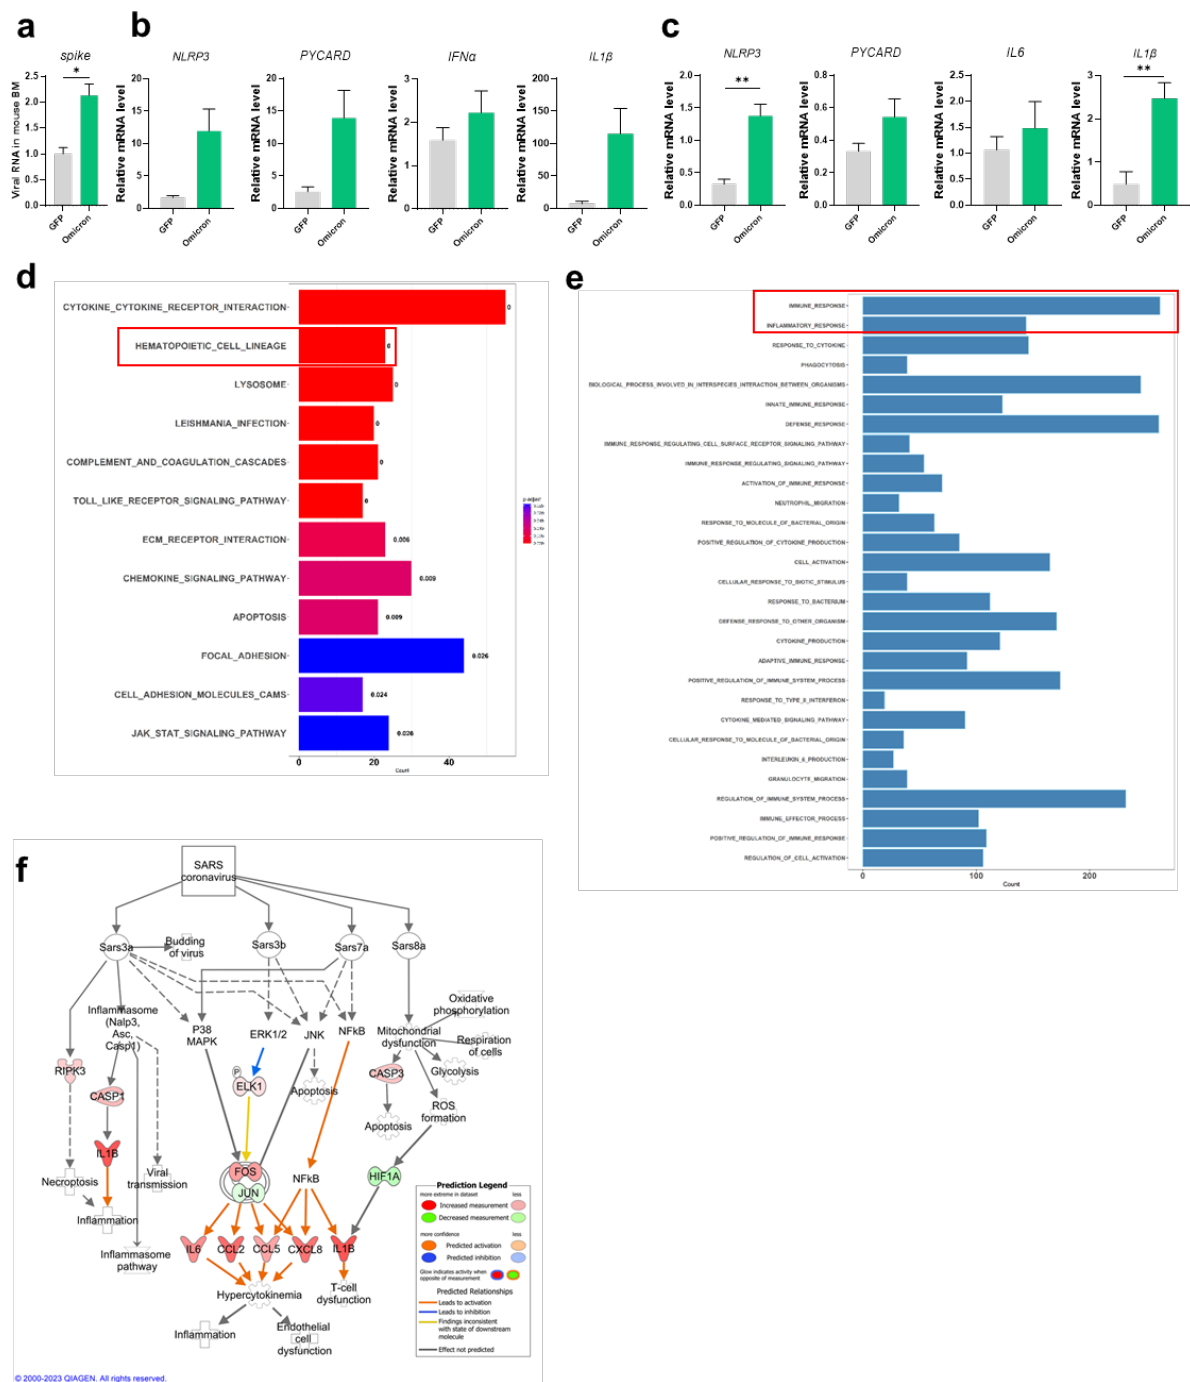

**Supplementary Fig. 2.** (a-c) Transcription levels of viral RNA (a), pro-inflammatory genes and BM niche related factors (b) in bone marrow and pro-inflammatory genes in spleen (c) were determined by qRT-PCR. mRNA levels were normalized to *GAPDH*. (d, e) RNA sequencing was performed to evaluate the phenotype of BM human cells in NSG mice transplanted with Omicron PsV-infected HSPCs. (d) KEGG pathway analysis and (e) GO

enrichment analysis of the DEGs. (f) IPA analysis of BM human cells in NSG mice transplanted with Omicron PsV-infected HSPCs. \*,  $p < 0.05$ ; \*\*,  $p < 0.01$ ; \*\*\*,  $p < 0.001$ . Results are shown as mean  $\pm$  SEM.

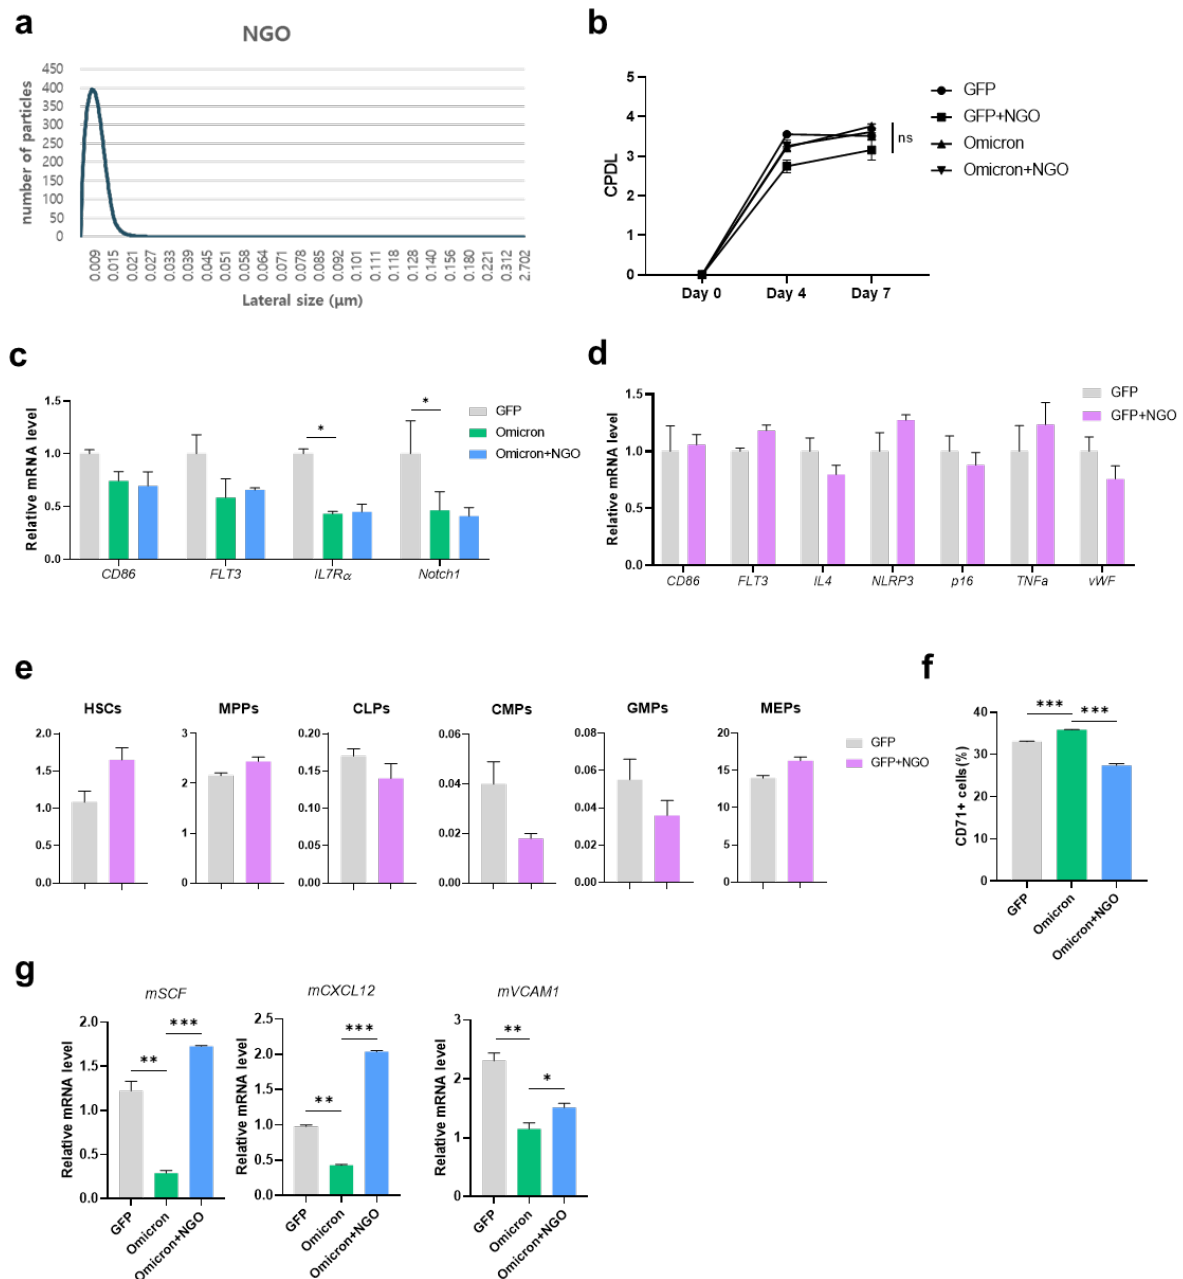

**Supplementary Fig. 3.** (a) Particle size distribution of NGOs. (b) CPDL of Omicron PsV-

infected HSPCs and NGO-treated HSPCs. (c) Transcriptional levels of lymphoid lineage-related genes in Omicron PsV-infected HSPCs were determined by qRT-PCR (d) Transcriptional levels of inflammaging-related genes in GFP- and NGO-treated HSPCs were determined by qRT-PCR. mRNA levels were normalized to *GAPDH*. (e) Hematopoietic lineage differentiation was investigated using lineage-specific markers and flow cytometry. Percentage HSPC lineage differentiation fractions in GFP- and NGO-treated group are shown. (f) Percentage of CD71+ RBC progenitor cells was determined by using flow cytometry (g) Transcriptional levels of BM-niche related genes in bone marrow were quantified using qRT-PCR. mRNA levels were normalized to *mGAPDH* \*,  $p<0.05$ ; \*\*,  $p<0.01$ ; \*\*\*,  $p<0.001$ . Results are shown as mean  $\pm$  SEM.
